# Supplementary material for: The amplitude and origin of sea-level variability during the Pliocene epoch
Source: Springer Nature journal article supplement (doi:10.1038/s41586-019-1619-z), 2019-10-02
Supplement: 41586_2019_1619_MOESM1_ESM.pdf [file 41586_2019_1619_MOESM1_ESM.pdf]

In the format provided by the authors and unedited.

# The amplitude and origin of sea-level variability during the Pliocene epoch

G. R. Grant<sup>1,2\*</sup>, T. R. Naish<sup>1</sup>, G. B. Dunbar<sup>1</sup>, P. Stocchi<sup>3</sup>, M. A. Kominz<sup>4</sup>, P. J. J. Kamp<sup>5</sup>, C. A. Tapia<sup>6</sup>, R. M. McKay<sup>1</sup>, R. H. Levy<sup>1,2</sup> & M. O. Patterson<sup>7</sup>

---

<sup>1</sup>Antarctic Research Centre, Victoria University of Wellington, Wellington, New Zealand. <sup>2</sup>GNS Science, Lower Hutt, New Zealand. <sup>3</sup>Coastal Systems Department, Royal Netherlands Institute for Sea Research, and Utrecht University, Den Burg, The Netherlands. <sup>4</sup>Department of Geological and Environmental Sciences, Western Michigan University, Kalamazoo, MI, USA. <sup>5</sup>School of Science, University of Waikato, Hamilton, New Zealand. <sup>6</sup>Departamento de Obras Civiles y Geología, Facultad de Ingeniería, Universidad Católica de Temuco, Temuco, Chile. <sup>7</sup>Binghamton University, State University of New York, Binghamton, NY, USA. \*e-mail: [g.grant@gns.cri.nz](mailto:g.grant@gns.cri.nz)

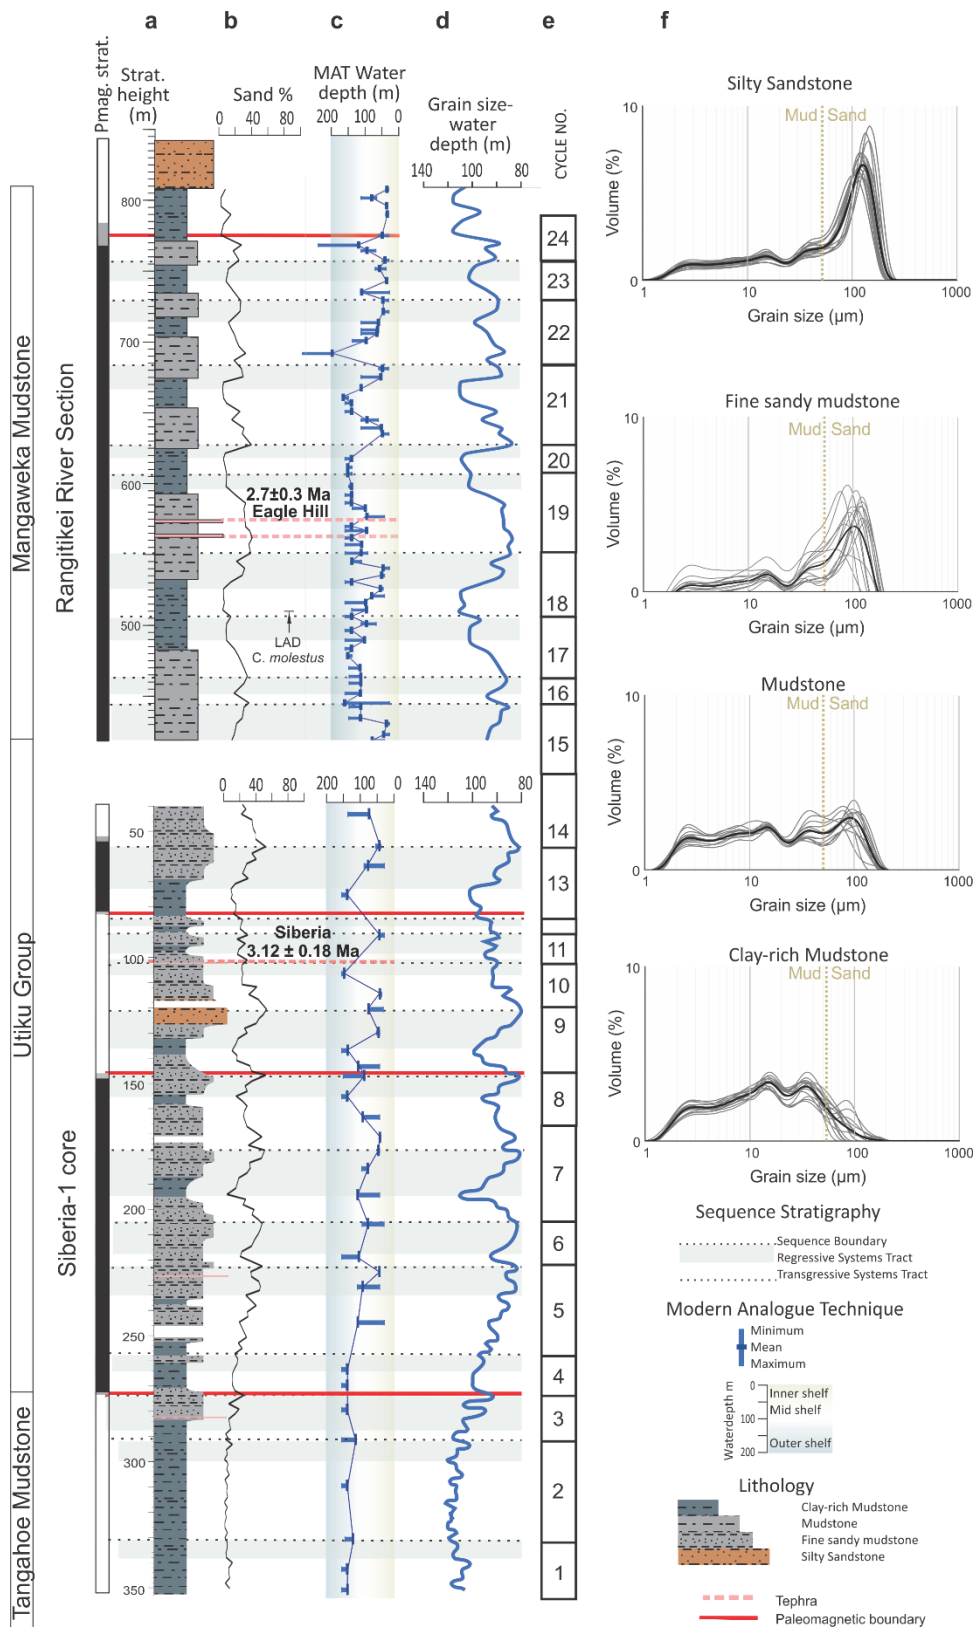

**Supplementary Fig. 1 Detailed stratigraphy of the PlioSeaNZ record. A** Sequence stratigraphic and lithostratigraphic framework of the Siberia-1 core and Rangitikei River Section, with magnetostratigraphic and tephrochronological age datums. **A** Lithology, **b** Percentage sand, and water depth estimates from **c** benthic foraminiferal Modern Analogue Technique<sup>6</sup> and **d** the grain size-water depth technique presented in this paper, with **e** sediment cycle numbers and **f** grain size histograms of each lithology.

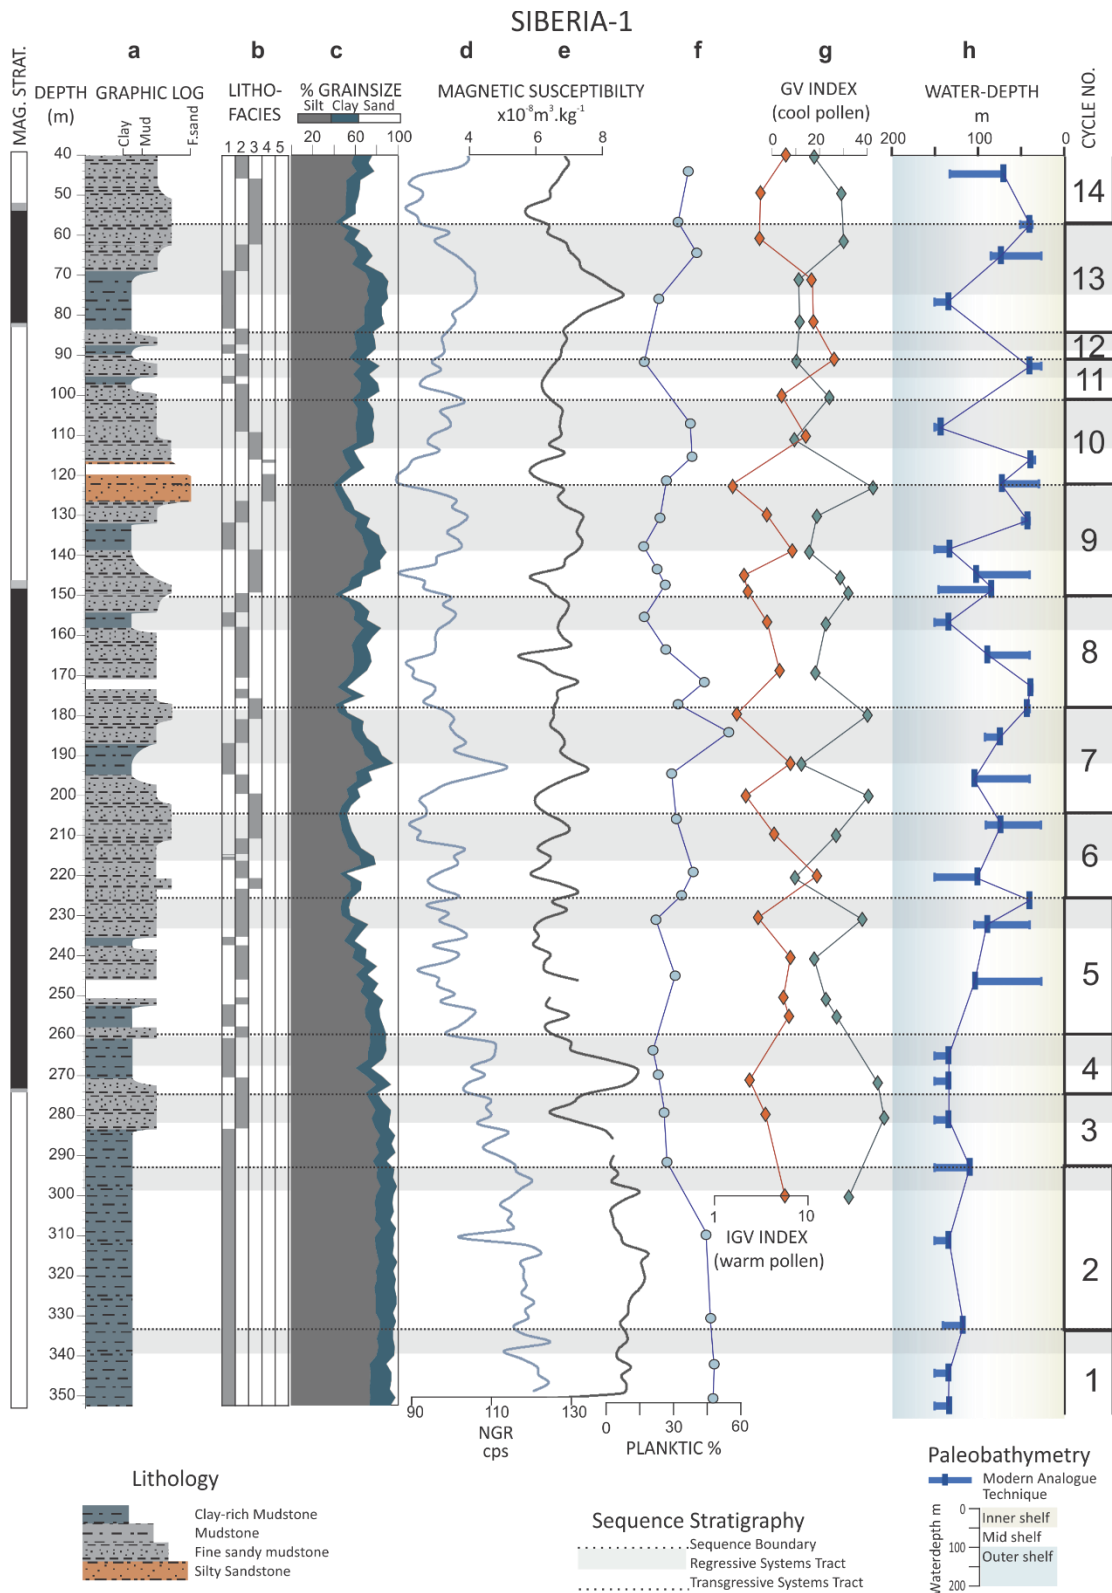

**Supplementary Fig. 2. Sedimentary and climatic cyclicity of the Siberia-1 core <sup>6</sup>.** Cyclicity is highlighted by **a** lithology, **b** lithofacies, **c** grain size, physical property logs **d** Natural gamma-ray (NGR) and **e** Magnetic susceptibility, **f** percentage planktic foraminifera, **g** pollen assemblages and **h** water depth. All are described in ref. 7.

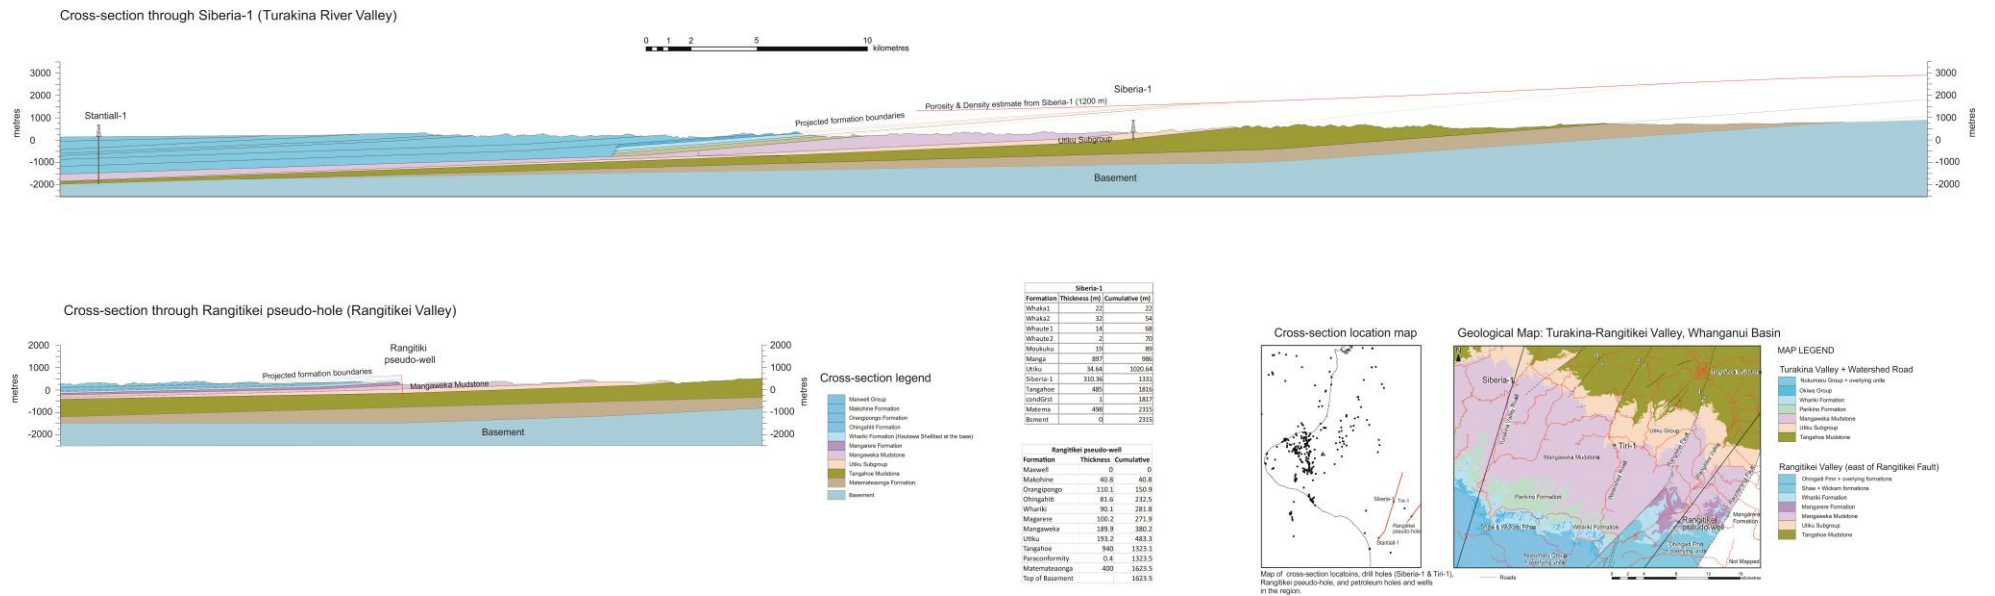

Supplementary Fig. 3 Geologic map of central-northern part of Whanganui Basin and cross-sections through Siberia-1 core and the Rangitikei pseudo-well. Stratigraphic thickness of mapped units from core top to Mesozoic basement are given for Siberia-1 and for the Rangitikei pseudo-well. An estimate of the section eroded from the top of Siberia-1 is shown in the upper cross-section (see Methods).

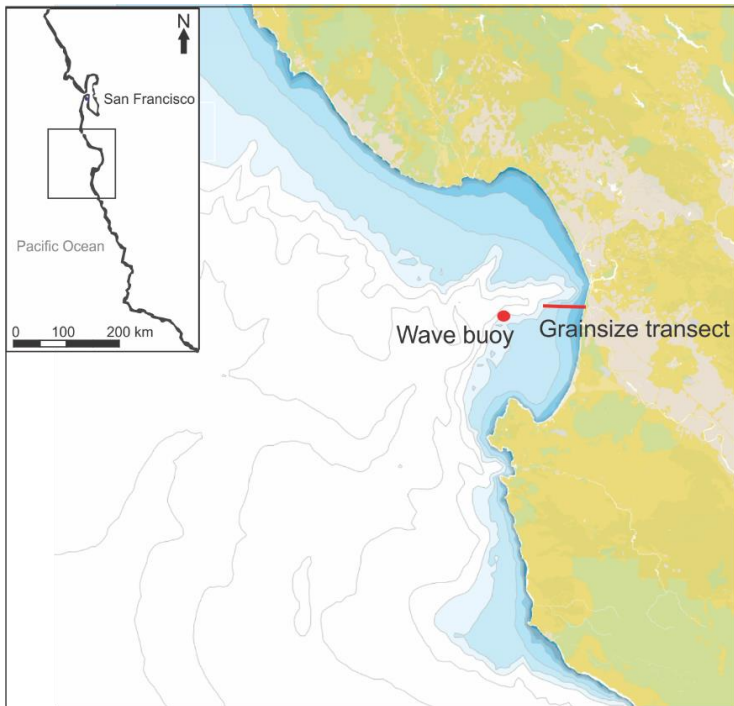

Supplementary Fig. 4 Location map<sup>42</sup> of the wave buoy used and modern transect of Monterey Bay. Used to determine wave height ( $H_s$ ) and peak wave period ( $T_p$ ) for sea floor near-bed velocity calculations<sup>41</sup> and modern grain size transect for the Monterey Bay dataset<sup>35</sup> (Extended Data Fig. 1).

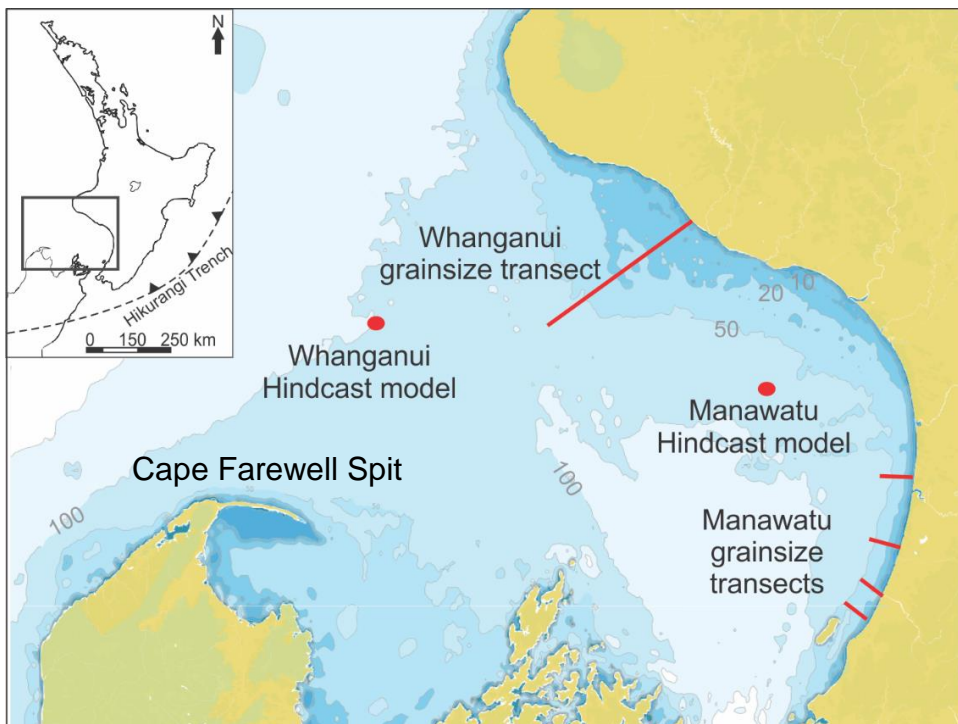

Supplementary Fig. 5. Location map<sup>42</sup> of the hindcast wave models and modern transects of Whanganui and Manawatu. Used to determine wave height and period for sea floor near-bed velocity calculations<sup>40,42</sup> and grain size transects for the Whanganui<sup>39</sup> and Manawatu<sup>36</sup> coastlines (Extended Data Fig. 1).
